# Supplementary material
Source: Springer Nature journal article supplement (https://www.springermedizin.de/resource/supplementary/12885_2012_3685_MOESM1_ESM.pdf/9465928)

**A**

|                   | 1     |        | 2         |       | 3         |        | 4   |      | 5       |       | 6         |       | 7    |       | 8       |       | 9      |       | 10     |        |
|-------------------|-------|--------|-----------|-------|-----------|--------|-----|------|---------|-------|-----------|-------|------|-------|---------|-------|--------|-------|--------|--------|
|                   | A2780 |        | A2780-ADR |       | A2780-CIS |        | TC1 |      | OVCAR-3 |       | OVCAR-EPO |       | Hey  |       | Hey-EPO |       | SKOV-6 |       | OV2774 |        |
| <b>Paclitaxel</b> | 0.003 | 0.0005 | 1.24      | 0.265 | 0.003     | 0.0002 | 10  | 3.2  | 0.022   | 0.002 | 0.014     | 0.003 | 0.01 | 0.002 | 0.005   | 0.001 | 0.036  | 0.007 | 0.0029 | 0.0004 |
| <b>Cisplatin</b>  | 0.485 | 0.006  | 2         | 0.49  | 7.9       | 2.3    | 2.6 | 0.28 | 1.8     | 0.254 | 0.539     | 0.106 | 2.36 | 0.504 | 0.96    | 0.247 | 3.687  | 0.122 | 2.835  | 0.491  |

**B**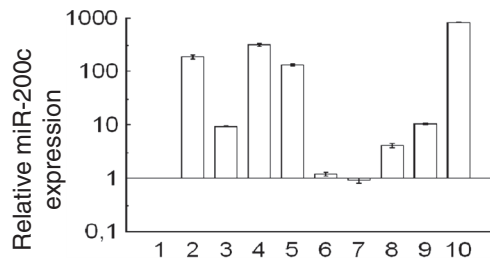**C**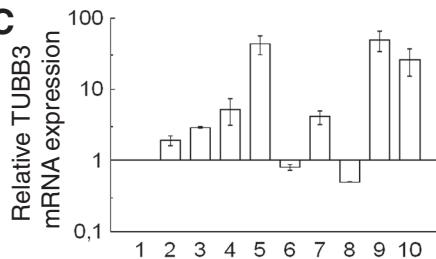**D**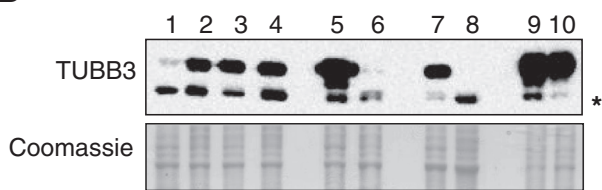**E**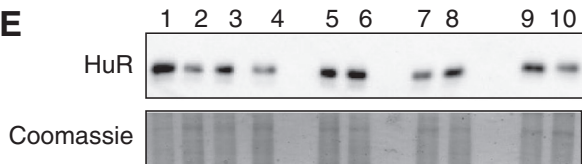**F**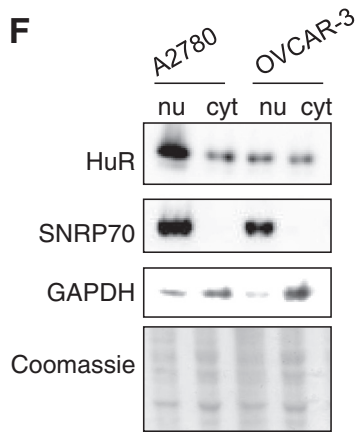

Supplement: MOESM1 [file 9465928]
